# Supplementary material for: Is Childhood Overweight/Obesity Perceived as a Health Problem by Mothers of Preschool Aged Children in Bangladesh? A Community Level Cross-Sectional Study
Source: MDPI journal article supplement (doi:10.3390/ijerph16020202), 2019-01-12
Supplement: s1 [file s1]

# ***Supplementary Materials: Is Childhood Overweight/Obesity Perceived as a Health Problem by Mothers of Preschool Aged Children in Bangladesh? A Community Level Cross-Sectional Study***

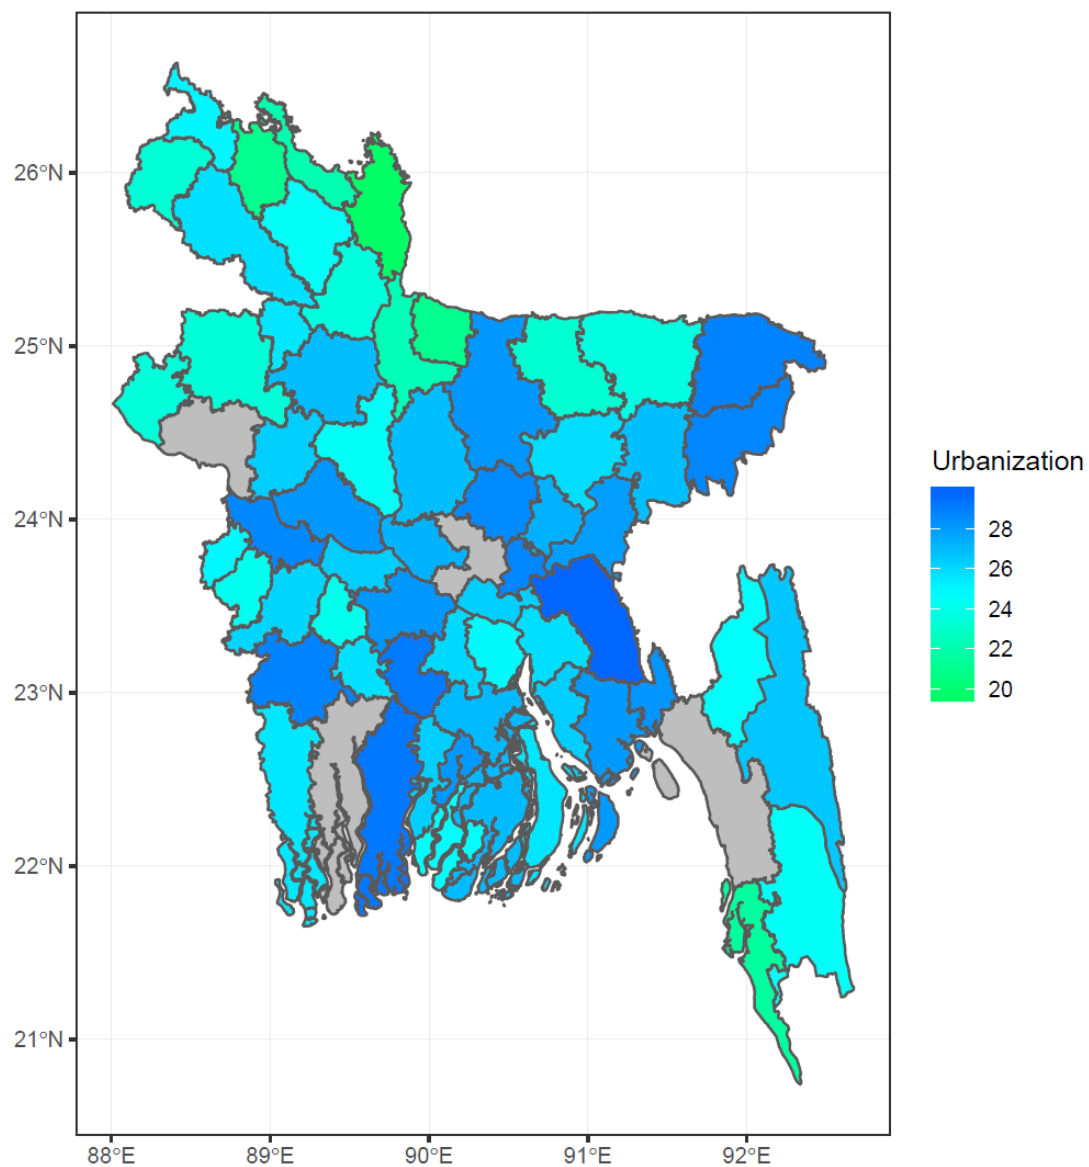

**Figure S1.** District town specific percentage of urbanisation based on a calculated urbanisation index utilizing data on population size, literacy rate, percentage of population with access to tap water for drinking, percentage with sanitary toilet facilities, and percentage with access to electricity.

**Table S1.** Perceptions and knowledge of childhood overweight and obesity by preschool type.

| Variable                                                  | Category        | Secular (% , n) | Noorani (% , n) | p-Value |
|-----------------------------------------------------------|-----------------|-----------------|-----------------|---------|
| Childhood obesity is a health problem                     | Yes             | 36.1 (142)      | 33.5 (63)       | 0.81    |
|                                                           | No              | 53.2 (209)      | 55.9 (105)      |         |
|                                                           | Don't know      | 10.7 (42)       | 3.4 (20)        |         |
| Childhood obesity is a sign of good health                | Yes             | 26.0 (102)      | 23.4 (44)       | 0.70    |
|                                                           | No              | 34.7 (136)      | 34.0 (64)       |         |
|                                                           | Don't Know      | 39.3 (154)      | 42.6 (80)       |         |
| An obese child will be healthy when becomes adult         | Yes             | 11.2 (44)       | 8.5 (16)        | 0.13    |
|                                                           | No              | 10.2 (40)       | 15.4 (29)       |         |
|                                                           | Don't Know      | 78.6 (309)      | 76.1 (143)      |         |
| Consuming junk food                                       | Yes             | 41.0 (161)      | 33.5 (63)       | 0.07    |
|                                                           | No              | 22.9 (90)       | 20.7 (39)       |         |
|                                                           | Don't Know      | 36.1 (142)      | 45.7 (86)       |         |
| Lack of physical activity                                 | Yes             | 39.9 (157)      | 35.6 (67)       | 0.57    |
|                                                           | No              | 18.8 (74)       | 19.1 (36)       |         |
|                                                           | Don't Know      | 41.2 (162)      | 45.2 (85)       |         |
| Spending more than 2 h screen time                        | Yes             | 29.3 (115)      | 30.9 (58)       | 0.007   |
|                                                           | No              | 30.5 (120)      | 18.6 (35)       |         |
|                                                           | Don't Know      | 40.2 (158)      | 50.5 (95)       |         |
| Lack of play ground                                       | Yes             | 44.0 (173)      | 43.3 (81)       | 0.04    |
|                                                           | No              | 21.6 (85)       | 13.98 (26)      |         |
|                                                           | Don't Know      | 34.4 (135)      | 42.8 (80)       |         |
| Knowledge of any health consequences of childhood obesity | Yes (Any other) | 23.4 (92)       | 25.0 (47)       | 0.73    |
|                                                           | Don't Know      | 76.6 (302)      | 75.0 (141)      |         |

**Table S2:** Proportion of perception (Yes)

| Variables                                         | Sex                |                     | Mother's Education |                   | Father's Education |                   | Monthly Income      |                        | Child's Status             |                       |                                 |
|---------------------------------------------------|--------------------|---------------------|--------------------|-------------------|--------------------|-------------------|---------------------|------------------------|----------------------------|-----------------------|---------------------------------|
|                                                   | Boy<br>%, <i>n</i> | girl<br>%, <i>n</i> | PS<br>%, <i>n</i>  | HG<br>%, <i>n</i> | PS<br>%, <i>n</i>  | HG<br>%, <i>n</i> | <10K<br>%, <i>n</i> | 25–50+K<br>%, <i>n</i> | Underweight<br>%, <i>n</i> | Normal<br>%, <i>n</i> | Overweight/Obese<br>%, <i>n</i> |
| Childhood obesity is a health problem             | 62.4 (128)         | 37.6 (77)           | 42.6 (87)          | 57.4 (117)        | 32.8 (65)          | 67.2 (133)        | 42.2 (62)           | 57.8 (85)              | 29.8 (61)                  | 55.1 (113)            | 15.1 (31)                       |
| Childhood obesity is a sign of good health        | 55.5 (81)          | 44.5 (65)           | 47.6 (69)          | 52.4 (76)         | 36.4 (52)          | 63.6 (91)         | 54.6 (59)           | 45.4 (49)              | 31 (45)                    | 60 (87)               | 9 (13)                          |
| An obese child will be healthy when becomes adult | 60 (36)            | 40 (24)             | 60 (36)            | 40 (24)           | 55.0 (33)          | 45.0 (27)         | 70.5 (31)           | 29.5 (13)              | 18.6 (11)                  | 71.2 (42)             | 10.2 (6)                        |
| Family member will be critical if child is thin   | 54 (141)           | 46 (120)            | 54.4 (142)         | 45.6 (119)        | 43.8 (113)         | 56.2 (145)        | 58.1 (111)          | 41.9 (80)              | 38.2 (99)                  | 52.9 (137)            | 8.9 (23)                        |
| Factors contributing childhood obesity            |                    |                     |                    |                   |                    |                   |                     |                        |                            |                       |                                 |
| Consuming junk food                               | 54.5 (122)         | 45.5 (102)          | 31.5 (70)          | 68.5 (152)        | 22.8 (50)          | 77.2 (169)        | 30 (48)             | 70 (112)               | 25.6 (57)                  | 53.8 (120)            | 20.6 (46)                       |
| Lack of physical activity                         | 57.1 (128)         | 42.9 (96)           | 29.5 (66)          | 70.5 (158)        | 21.2 (47)          | 78.8 (175)        | 34.4 (55)           | 65.6 (105)             | 25.1 (56)                  | 55.2 (123)            | 19.7 (44)                       |
| Spending more than 2 h screen time                | 61.3 (106)         | 38.7 (67)           | 37.6 (65)          | 62.4 (108)        | 27.9 (48)          | 72.1 (124)        | 39.1 (50)           | 60.9 (78)              | 27.3 (47)                  | 51.2 (88)             | 21.5 (37)                       |
| Lack of play ground                               | 57.1 (145)         | 42.9 (109)          | 37.4 (95)          | 62.6 (159)        | 25.8 (65)          | 74.2 (187)        | 37.3 (69)           | 62.7 (116)             | 28.1 (71)                  | 56.1 (142)            | 15.8 (40)                       |
